# Supplementary material for: Kinematic characterization of backhand stroke accuracy in squash based on kinematic variables between two different skill levels—a preliminary cross-sectional study
Source: PeerJ. 2024 Oct 18;12:e18333. doi: 10.7717/peerj.18333 (PMC11493072; doi:10.7717/peerj.18333)
Supplement: Supplemental Information 1 [file peerj-12-18333-s001.xlsx]

## Sheet: Sheet1
	right elbow		right knee		beat arm angle (music)		Tap surface angle (angle to the horizontal)		Racket head speed
	The end of the lead-in moment	End frame of the swing phase (moment of hitting)	The end of the lead-in moment	End frame of the swing phase (moment of hitting)	The end of the lead-in moment	End frame of the swing phase (moment of hitting)	The end of the lead-in moment	End frame of the swing phase (moment of hitting)	The end of the lead-in moment	End frame of the swing phase (moment of hitting)	max
s3	82.897	136.74	174.32	130.85	132.89	150.57	97.245	46.485		20.745	20.8382
s4	42.035	119.03	133.89	128.91	137.26	138	87.739	124.76		20.113	20.2533
s5	63.869	144.15	160.28	122.16	147.46	126.46	98.846	51.703		19.14	19.1641
s6	87.4	145.67	142.12	121.34	113.2	149.54	71.955	35.347		19.377	19.4738
s7	74.543	101.93	155.97	127.73	124.37	100.75	96.769	127.81		19.193	20.7637
s8	65.216	142.53	150.05	120.8	134.21	146.49	94.733	60.039		20.287	20.5431
s9	74.82	141.71	139.03	127.28	114.32	154.36	110.07	69.245		19.372	19.3725
s10	85.444	140.86	157.69	137.97	117.55	149.27	95.733	143.62		20.581	20.6204
s11											22.8395
average level	69.0503	136.398	152.653	125.815	132.703	141.142	88.9463	64.5738	#DIV/0!	19.8438	19.9324
	20.6971	12.2179	18.1716	4.77196	14.3636	11.3262	12.3428	40.6999	#DIV/0!	0.72981	0.758052
high level	75.0058	131.757	150.685	128.445	122.613	137.718	99.3263	100.178	#DIV/0!	19.8583	20.8278
	8.2673	19.8967	8.43096	7.09554	8.79366	24.8595	7.21057	41.7082	#DIV/0!	0.679507	1.25428

## Sheet: Sheet2
	The end of the lead-in moment	End frame of the swing phase (moment of hitting)	The end of the lead-in moment	End frame of the swing phase (moment of hitting)	The end of the lead-in moment	End frame of the swing phase (moment of hitting)	The end of the lead-in moment	End frame of the swing phase (moment of hitting)
s3	82.897	136.74	174.32	130.85	132.89	150.57	97.245	46.485
s4	42.035	119.03	133.89	128.91	137.26	138	87.739	124.76
s5	63.869	144.15	160.28	122.16	147.46	126.46	98.846	51.703
s6	87.4	145.67	142.12	121.34	113.2	149.54	71.955	35.347
s7	74.543	101.93	155.97	127.73	124.37	100.75	96.769	127.81
s8	65.216	142.53	150.05	120.8	134.21	146.49	94.733	60.039
s9	74.82	141.71	139.03	127.28	114.32	154.36	110.07	69.245
s10	85.444	140.86	157.69	137.97	117.55	149.27	95.733	143.62

## Sheet: Sheet3
	right elbow		right knee		beat arm angle (music)
	The end of the lead-in moment	hitting moment	The end of the lead-in moment	hitting moment	The end of the lead-in moment	hitting moment
average level	69.0503	136.398	152.653	125.815	132.703	141.142
	20.6971	12.2179	18.1716	4.77196	14.3636	11.3262
high level	75.0058	131.757	150.685	128.445	122.613	137.718
	8.2673	19.8967	8.43096	7.09554	8.79366	24.8595

## Sheet: Sheet4
	participants	(a person's) height	weight	(a person's) age		international ranking
S1	1	190	70
S2	2	179	68.5	1996-01-28	28.2603
S3	3	190	69	2002-11-16	21.4548
S4	4	182	75	1997-08-13	26.7178
S5	5	188	75	2004-03-09	20.1425
S6	6	183	90	1992-06-28	31.8466
S7	7	184	84	1992-08-12	31.7233	21
S8	8	182	75	1995-06-05	28.9096	37
S9	9	180	72	1992-09-15	31.6301	32
S10	10	168	62	1998-01-26	26.263	26
S11	11	179	66	1990-09-15	33.6329	45
	185.333	74.5833		25.6844
	178.6	71.8		30.1089
	4.63321	8.0896		4.85484
	6.22896	8.49706		2.87432
